# Supplementary material for: Wake steering optimization under uncertainty
Source: Copernicus journal article supplement (doi:10.5194/wes-5-413-2020), 2020-03-30
Supplement: Supplementary file 1 [file wes-5-413-2020-supplement.zip]

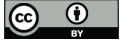

## *Supplement of*

# **Wake steering optimization under uncertainty**

**Julian Quick et al.**

*Correspondence to:* Julian Quick ([julian.quick@colorado.edu](mailto:julian.quick@colorado.edu))

- wes-5-413-2020-supplement-title-page.pdf
- OUU\_Supplement
  - example\_floris\_input.json
  - windRose.csv
- \_\_MACOSX
  - OUU\_Supplement
    - \* .\_example\_floris\_input.json
    - \* .\_windRose.csv

The copyright of individual parts of the supplement might differ from the CC BY 4.0 License.
